# Supplementary material for: Islet amyloid with macrophage migration correlates with augmented β-cell deficits in type 2 diabetic patients
Source: PubMed Central journal article supplement — Amyloid. 2014 Jul 9;21(3):191–201. doi: 10.3109/13506129.2014.937857 (PMC4196506; doi:10.3109/13506129.2014.937857), 2014-07-09
Supplement: AMY-21-191-s1.pdf [file AMY-21-191-s1.pdf]

### Supplemental Figure 1

Correlation of  $\beta$ -cell volume density with BMI, HbA1c and duration of diabetes in amyloid-rich diabetic group (DA+). There was no correlation between  $\beta$ -cell volume density and BMI (n=17), HbA1c (n=21), or duration of diabetes (n=19).

### Supplemental Figure 1

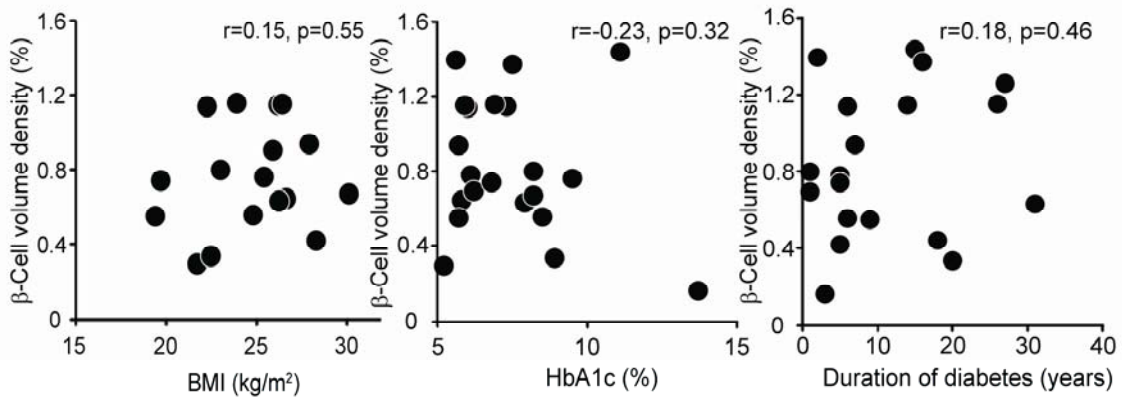

## Supplemental Figure 2

Relationship between macrophage infiltration in the islet and  $\beta$ -cell volume density or BMI. There was no significant correlation between the number of CD68 cells and  $\beta$ -cell volume density (Figure A) or BMI (Figure B) in amyloid-rich diabetic group (DA+). When BMI was matched in the subjects less than 23 among non-diabetic (red square) (ND, n=11), amyloid-free diabetic (blue rhombus) (DA-, n=10) and amyloid-rich diabetic groups (black triangle) (DA+, n=4), population of CD68 cells was still the highest in DA+ (Figure C).

## Supplemental Figure 2

A

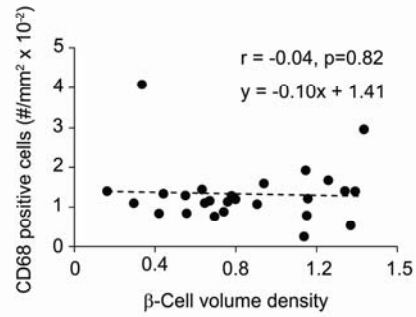

B

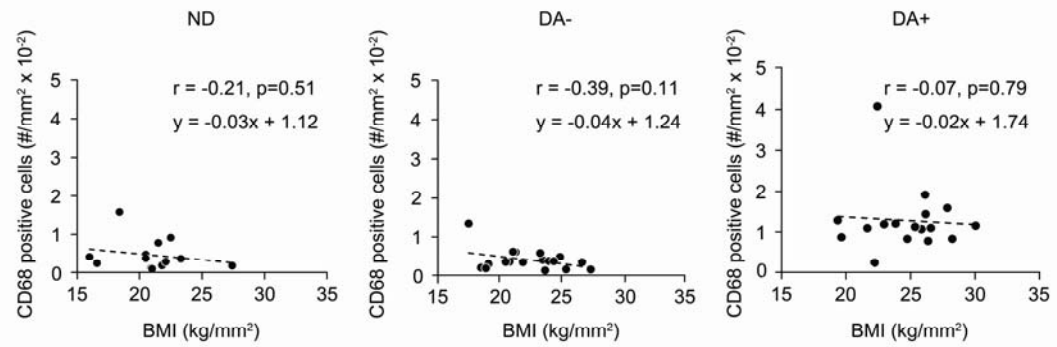

C

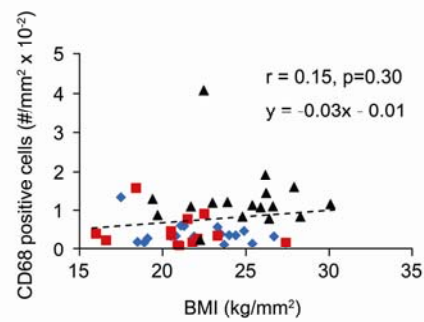

### **Supplemental Figure 3**

Relationships between  $\gamma$ H2AX-positivity and amyloid volume density (A) or CD68 cell population (B). There was no significant correlation in either relationship.

Supplemental Figure 3

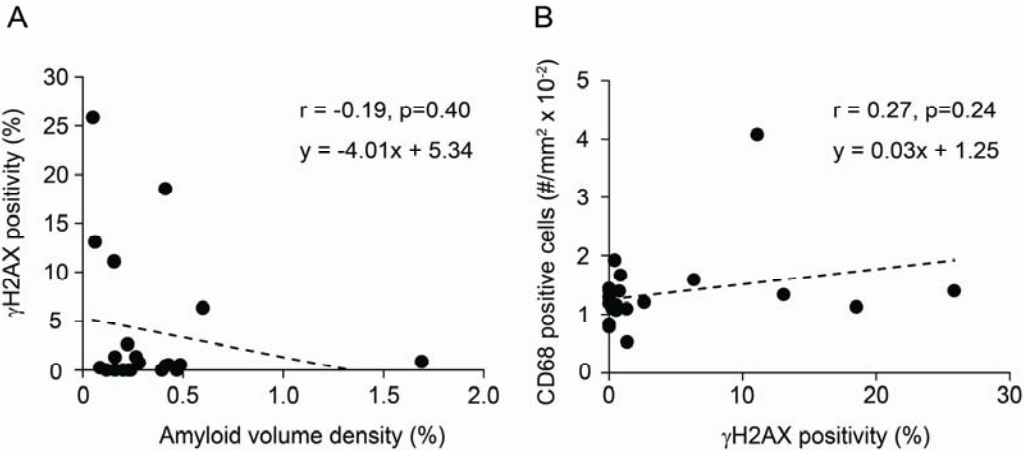

**Supplemental table 1** Detailed contents of investigated subjects

| Diabetic with amyloid |              |                |                             |                                     |                          |                                 |                    |               |
|-----------------------|--------------|----------------|-----------------------------|-------------------------------------|--------------------------|---------------------------------|--------------------|---------------|
| No.                   | Sex<br>(M/F) | Age<br>(years) | BMI<br>(kg/m <sup>2</sup> ) | Major cause of death                | Pancreatic weight<br>(g) | Duration of Diabetes<br>(years) | HbA1c<br>(%, NGSP) | Treatment     |
| 1                     | M            | 38             | -                           | Fistula cancer                      | 120                      | -                               | -                  | diet          |
| 2                     | M            | 40             | -                           | Bronchopneumonia                    | -                        | 2                               | 5.6                | insulin       |
| 3                     | M            | 45             | 25.9                        | Dilated cardiomyopathy              | 200                      | -                               | -                  | -             |
| 4                     | M            | 50             | -                           | Hyperosmolar hyperglycemic syndrome | -                        | 3                               | 13.7               | -             |
| 5                     | M            | 62             | -                           | Lung cancer                         | 70                       | 5                               | 6.1                | OHA           |
| 6                     | M            | 63             | 21.7                        | Bronchopneumonia                    | 170                      | -                               | 5.2                | OHA           |
| 7                     | M            | 64             | 27.9                        | Hepatocellular carcinoma            | 175                      | 7                               | 5.7                | OHA + insulin |
| 8                     | M            | 65             | 23.0                        | Bronchopneumonia                    | 80                       | 1                               | 8.2                | OHA           |
| 9                     | F            | 66             | 26.2                        | Bronchopneumonia                    | 82                       | 14                              | 7.3                | OHA + insulin |
| 10                    | F            | 66             | 22.5                        | Systemic MRSA infection, sepsis     | -                        | 20                              | 8.9                | insulin       |
| 11                    | M            | 67             | 22.3                        | Gastric cancer                      | 120                      | 6                               | 6.0                | -             |
| 12                    | M            | 67             | 26.4                        | Acute circulatory failure           | 205                      | 26                              | 5.9                | insulin       |
| 13                    | F            | 69             | 26.6                        | Hepatocellular carcinoma            | 195                      | -                               | 5.8                | insulin       |
| 14                    | M            | 70             | -                           | Suffocation                         | -                        | 15                              | 11.1               | diet          |
| 15                    | F            | 71             | 26.2                        | Acute myocardial infarction         | -                        | 31                              | 7.9                | insulin       |
| 16                    | M            | 74             | -                           | Hemorrhagic bronchopneumonia        | 200                      | 1                               | 6.2                | OHA           |
| 17                    | M            | 74             | 19.7                        | Hepatocellular carcinoma            | 150                      | 5                               | 6.8                | OHA           |
| 18                    | M            | 76             | -                           | Heart failure                       | -                        | 18                              | -                  | OHA           |
| 19                    | M            | 76             | 30.1                        | Gastrointestinal bleeding           | 135                      | -                               | 8.2                | diet          |
| 20                    | F            | 77             | 23.9                        | Lung cancer                         | 90                       | -                               | 6.9                | diet          |
| 21                    | M            | 77             | 19.4                        | Heart failure                       | 105                      | 9                               | 5.7                | diet          |

|         |   |          |                    |                             |                      |                    |                    |         |
|---------|---|----------|--------------------|-----------------------------|----------------------|--------------------|--------------------|---------|
| 22      | M | 78       | -                  | Acute myocardial infarction | 64                   | 27                 | -                  | insulin |
| 23      | F | 80       | 25.4               | Acute myocardial infarction | 75                   | -                  | 9.5                | OHA     |
| 24      | M | 82       | 24.8               | Bronchopneumonia            | -                    | 6                  | 8.5                | OHA     |
| 25      | F | 82       | -                  | Hepatocellular carcinoma    | 125                  | 16                 | 7.5                | insulin |
| 26      | M | 85       | 28.3               | Acute subdural hamatoma     | -                    | 5                  | -                  | OHA     |
| Mean±SE |   | 67.8±2.5 | 24.7±0.7<br>(n=17) |                             | 131.2±11.7<br>(n=18) | 11.4±2.2<br>(n=19) | 7.46±0.5<br>(n=21) |         |

Diabetic without amyloid

| No.     | Sex<br>(M/F) | Age<br>(years) | BMI<br>(kg/m <sup>2</sup> ) | Major cause of death        | Pancreatic weight<br>(g) | Duration of<br>Diabetes<br>(years) | HbA1c<br>(%, NGSP) | Treatment     |
|---------|--------------|----------------|-----------------------------|-----------------------------|--------------------------|------------------------------------|--------------------|---------------|
| 1       | F            | 45             | 25.4                        | Fulminant hepatitis         | -                        | 2                                  | 6.9                | OHA           |
| 2       | M            | 46             | 24.9                        | Pneumonia                   | 120                      | -                                  | -                  | untreated     |
| 3       | M            | 50             | 18.9                        | Pneumonia                   | 110                      | -                                  | 4.9                | untreated     |
| 4       | F            | 51             | 20.5                        | Dilated cardiomyopathy      | 110                      | 2                                  | 6.2                | OHA           |
| 5       | M            | 56             | 21.1                        | Myelodysplastic syndrome    | 130                      | -                                  | 8.4                | insulin       |
| 6       | M            | 58             | 18.5                        | Lung cancer                 | 120                      | 4                                  | 5.5                | diet          |
| 7       | M            | 63             | 23.3                        | Gastric cancer              | -                        | -                                  | 7.6                | diet          |
| 8       | M            | 63             | 23.7                        | Combined valvular disease   | 110                      | 11                                 | 4.8                | OHA           |
| 9       | M            | 65             | 26.7                        | Lung cancer                 | 110                      | -                                  | 8.7                | Insulin       |
| 10      | M            | 66             | 17.5                        | Lung abscess, Pneumonia     | 110                      | -                                  | 6.8                | OHA           |
| 11      | M            | 69             | 24.4                        | Multiple organ failure      | 120                      | -                                  | 5.7                | -             |
| 12      | M            | 72             | 24.0                        | Acute circulatory failure   | 110                      | 4                                  | 6.8                | OHA           |
| 13      | M            | 73             | 20.6                        | Acute myocardial infarction | 100                      | 18                                 | 9.6                | OHA           |
| 14      | M            | 73             | 21.9                        | Acute myocardial infarction | 170                      | 19                                 | 9.0                | OHA + insulin |
| 15      | M            | 73             | 24.3                        | Lung cancer                 | 120                      | -                                  | 8.1                | untreated     |
| 16      | M            | 75             | 21.3                        | Hepatocellular carcinoma    | 185                      | 3.3                                | 6.2                | insulin       |
| 17      | F            | 76             | 27.4                        | Ischemic colitis            | 140                      | 25                                 | 6.5                | insulin       |
| 18      | M            | 77             | 20.8                        | Gastric cancer              | -                        | 35                                 | -                  | -             |
| 19      | F            | 80             | 19.1                        | Acute myocardial infarction | 40                       | 10                                 | -                  | -             |
| 20      | M            | 82             | 23.5                        | Acute myocardial infarction | 150                      | 4                                  | 7.4                | OHA           |
| Mean±SE |              | 65.7±2.5       | 22.4±0.6<br>(n=20)          |                             | 120.1±7.6<br>(n=17)      | 11.4±3.1<br>(n=12)                 | 7.00±0.3<br>(n=17) |               |



---

**Non-diabetic**

---

| No. | Sex   | Age     | BMI                  | Major cause of death                | Pancreatic weight | Duration of Diabetes | HbA1c     | Treatment |
|-----|-------|---------|----------------------|-------------------------------------|-------------------|----------------------|-----------|-----------|
|     | (M/F) | (years) | (kg/m <sup>2</sup> ) |                                     | (g)               | (years)              | (%, NGSP) |           |
| 1   | F     | 32      | -                    | Malignant lymphoma                  | 140               | NA                   | NA        | NA        |
| 2   | M     | 44      | 16.0                 | Pulmonary tuberculosis              | 150               | NA                   | NA        | NA        |
| 3   | M     | 49      | 23.3                 | Sarcomatoid carcinoma               | 130               | NA                   | NA        | NA        |
| 4   | F     | 53      | 21.0                 | Malignant lymphoma                  | 200               | NA                   | NA        | NA        |
| 5   | F     | 54      | 20.9                 | Vulvar cancer                       | 115               | NA                   | NA        | NA        |
| 6   | M     | 56      | 20.5                 | Liver cirrhosis, Heart failure      | 200               | NA                   | NA        | NA        |
| 7   | F     | 61      | 21.5                 | Angiosarcoma                        | 110               | NA                   | NA        | NA        |
| 8   | F     | 63      | -                    | Acute respiratory distress syndrome | 103               | NA                   | NA        | NA        |
| 9   | F     | 67      | -                    | Dilated cardiomyopathy              | 120               | NA                   | NA        | NA        |
| 10  | M     | 67      | 18.4                 | Esophageal cancer                   | -                 | NA                   | NA        | NA        |
| 11  | F     | 67      | 16.6                 | Acute circulatory failure           | 80                | NA                   | NA        | NA        |
| 12  | F     | 68      | -                    | Aortic dissection                   | 120               | NA                   | NA        | NA        |
| 13  | M     | 68      | 20.15                | Liver cirrhosis                     | 100               | NA                   | NA        | NA        |
| 14  | F     | 69      | 22.5                 | Non-occlusive mesenteric ischemia   | 80                | NA                   | NA        | NA        |
| 15  | F     | 74      | 20.5                 | Drug induced hepatitis              | 170               | NA                   | NA        | NA        |
| 16  | M     | 74      | 24.0                 | Malignant lymphoma                  | 110               | NA                   | NA        | NA        |
| 17  | F     | 75      | 27.4                 | Gastric cancer                      | 110               | NA                   | NA        | NA        |
| 18  | M     | 80      | 18.4                 | Interstitial pneumonia              | 90                | NA                   | NA        | NA        |
| 19  | M     | 81      | 21.8                 | Acute myocardial infarction         | 125               | NA                   | NA        | NA        |
| 20  | M     | 81      | 22.1                 | Acute myocardial infarction         | 110               | NA                   | NA        | NA        |

---

Mean±SE                      64.2±2.9                      21.0±0.7                                              124.4±7.9

(n=16)

(n=19)
